# Supplementary material for: Molecular Fingerprints of Hemoglobin on a Nanofilm Chip
Source: PubMed Central journal article supplement (PMC6165033; doi:10.3390/s18093016), 2018-09-09
Supplement: sensors-18-03016-s001.pdf [file sensors-18-03016-s001.pdf]

Supplementary Material

# Molecular Fingerprints of Hemoglobin on a NanoFilm Chip

Yeşeren Saylan and Adil Denizli \*

Department of Chemistry, Hacettepe University, 06800, Ankara, Turkey

\* Correspondence: Hacettepe University, Department of Chemistry, 06800, Ankara, Turkey;

[denizli@hacettepe.edu.tr](mailto:denizli@hacettepe.edu.tr)

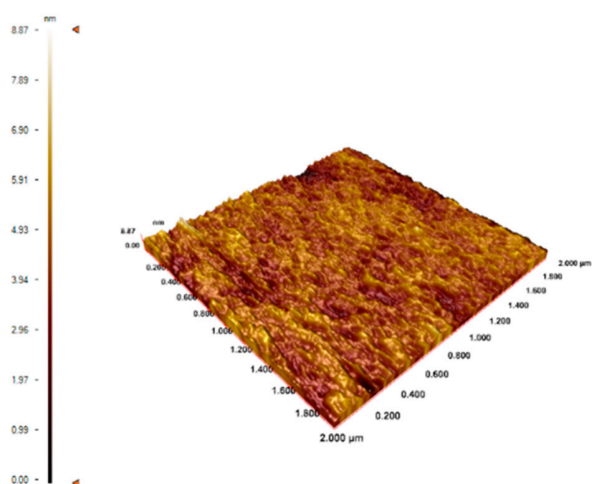

Figure S1. The atomic force microscope images of the bare chip.

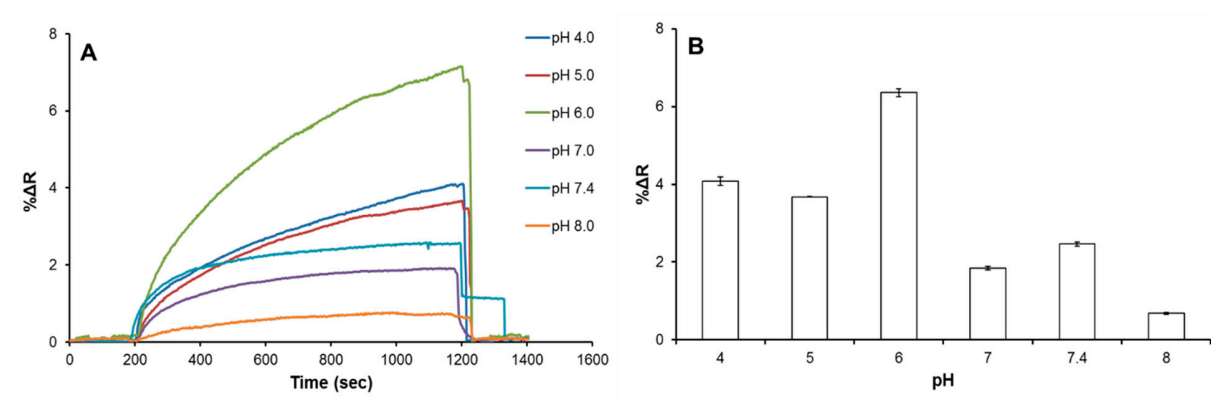

Figure S2. The real-time responses of molecularly imprinted nanofilm on-chip to same concentration of hemoglobin solutions at different pH in terms of a sensorgram (A) and a bar graph (B).

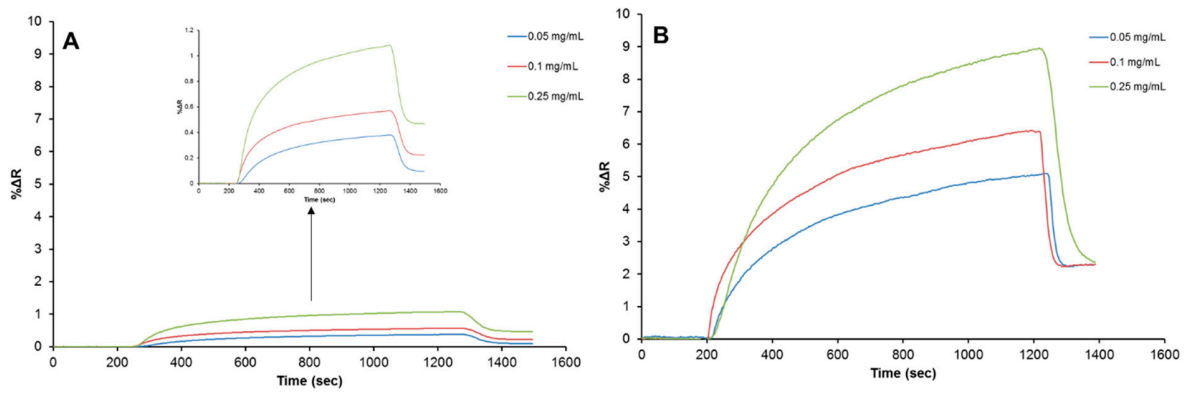

**Figure S3.** The comparison of real-time responses of non-imprinted (A) and molecularly imprinted nanofilm on-chips to hemoglobin sample solutions.
